# Supplementary material for: Variation of Immune Cell Responses in Humans Reveals Sex-Specific Coordinated Signaling Across Cell Types
Source: PubMed Central journal article supplement (PMC8995898; doi:10.3389/fimmu.2022.867016), 2022-03-28

Figure S1:

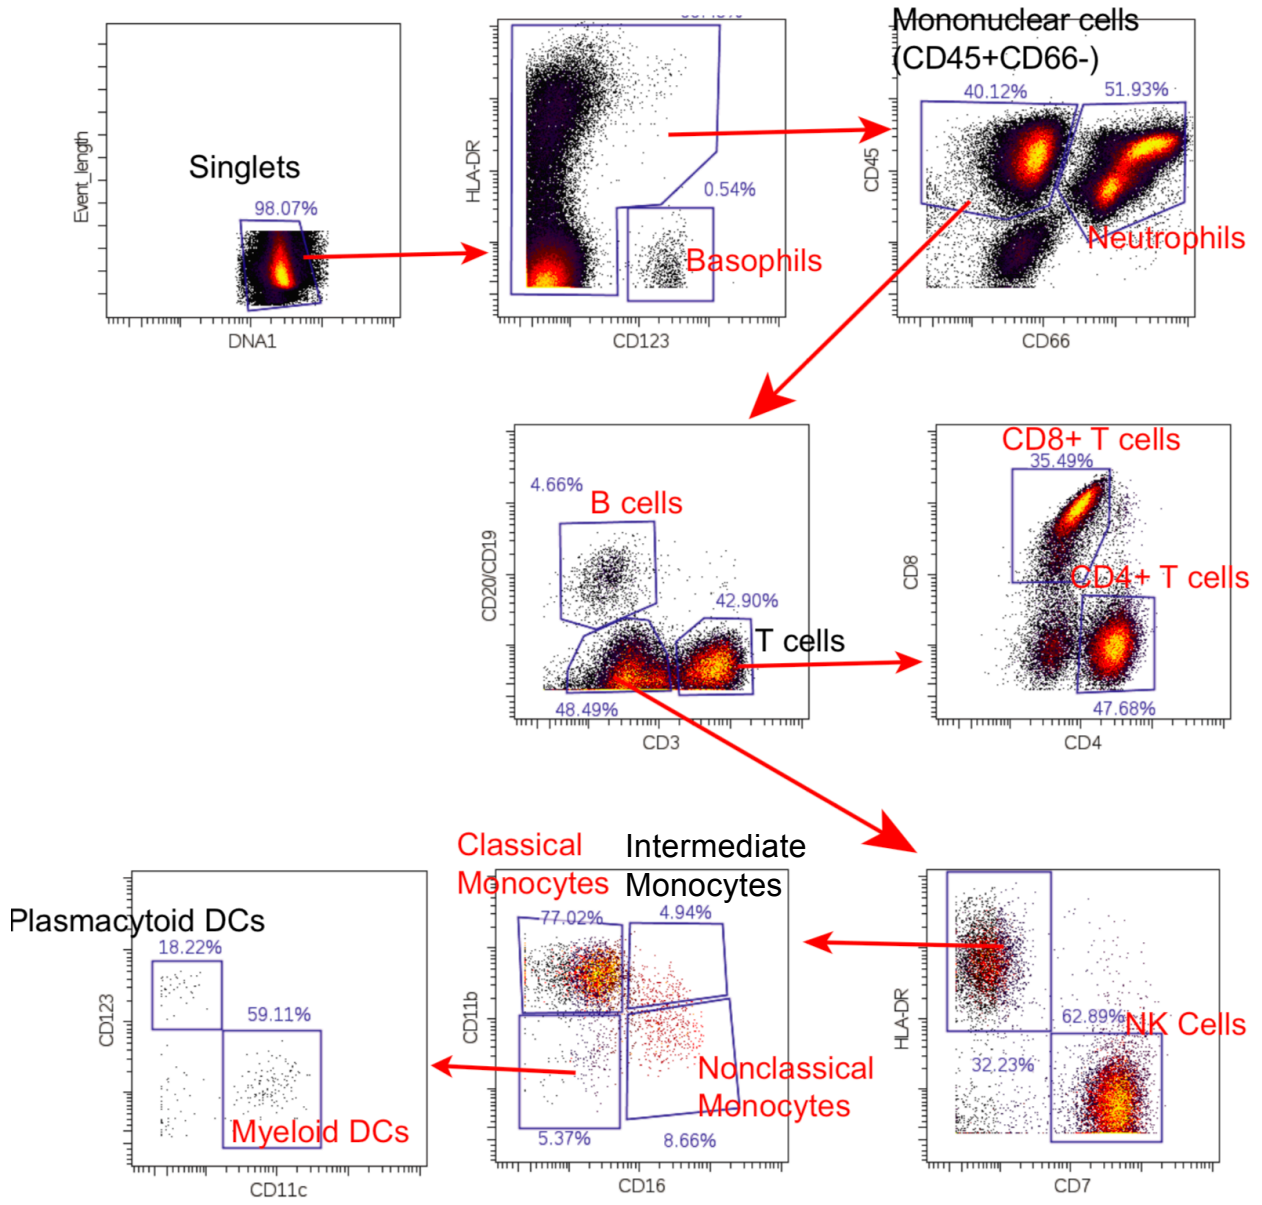

Supplement: DataSheet_1.pdf [file DataSheet_1.pdf]
